# Supplementary material for: Simultaneous Removal of Nitrate and Phosphate in a Pyrrhotite and Sulfur-Circulating Packed Bed Reactor
Source: MDPI journal article supplement (doi:10.3390/w15122158), 2023-06-07
Supplement: s1 [file s1]

Archive with 1 entries (1 files):
- water-2358231-supplementary.pdf
