# Supplementary material for: Simultaneous Removal of Nitrate and Phosphate in a Pyrrhotite and Sulfur-Circulating Packed Bed Reactor
Source: MDPI journal article supplement (doi:10.3390/w15122158), 2023-06-07
Supplement: s1 [file s1 › water-2358231-supplementary.pdf]

Supplementary Material

# Simultaneous Removal of Nitrate and Phosphate in a Pyrrhotite and Sulfur-Circulating Packed Bed Reactor

Meiling Yu <sup>1,2</sup>, Yongyou Hu <sup>1,2,\*</sup>, Donghui Liang <sup>1,3,\*</sup>, Guobin Wang <sup>4</sup>, Xiaoqiang Zhu <sup>1,4</sup> and Jieyun Xie <sup>4</sup>

<sup>1</sup> School of Environment and Energy, South China University of Technology, Guangzhou Higher Education Mega Centre, Guangzhou 510006, China

<sup>2</sup> The Key Lab of Pollution Control and Ecosystem Restoration in Industry Clusters, Ministry of Education, South China University of Technology, Guangzhou Higher Education Mega Centre, Guangzhou 510006, China

<sup>3</sup> College of Urban and Rural Construction, Zhongkai University of Agriculture and Engineering, Zhongkai Road, Haizhu District, Guangzhou 510225, China

<sup>4</sup> Pengkai Environment Technology Co., Ltd., Guangzhou 511493, China

\* Correspondence: ppyyhu@scut.edu.cn (Y.H.); liangdonghui0303@163.com (D.L.); Tel.: +86-136-0274-6125 (Y.H.); +86-187-2935-8153 (D.L.)

## Text S1: Data processing method

*Calculation method of removal efficiency:*

$$\text{Removal efficiency (\%)} = (1 - C_t/C_0) \times 100\% \quad (\text{S1})$$

Among them,  $t$  was the reaction time (h),  $C_0$  and  $C_t$  were the pollutant concentration (mg/L) at 0 h and  $t$  h, respectively.

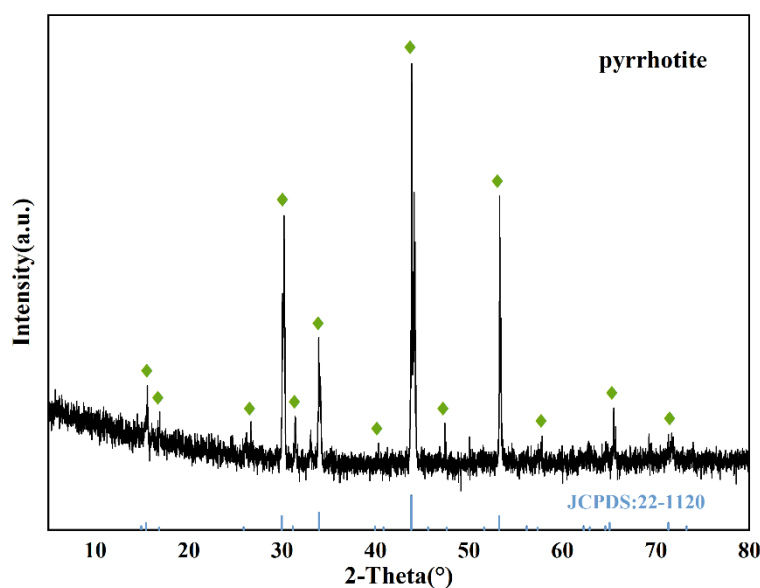

**Figure S1.** XRD pattern of pyrrhotite.

**Table S1.** Absolute abundance of denitrification genes in the two reactors.

| The gene | The Reactor | Copy number(copy/uL) |
|----------|-------------|----------------------|
| NapA     | PS-CPBR     | 992.83               |
|          | P-CPBR      | 12.42                |
| NarG     | PS-CPBR     | 603029.19            |
|          | P-CPBR      | 58788.98             |
| NirK     | PS-CPBR     | 487952.47            |
|          | P-CPBR      | 309008.54            |
| NirS     | PS-CPBR     | 8208009.06           |
|          | P-CPBR      | 1857439.36           |
| NorB     | PS-CPBR     | 3233.13              |
|          | P-CPBR      | 100.76               |
| Nor      | PS-CPBR     | 2037.00              |
|          | P-CPBR      | 7881.81              |
| NosZ     | PS-CPBR     | 156188.64            |
|          | P-CPBR      | 72997.21             |
